# Supplementary material
Source: publisher figshare collection journal article supplement (https://frontiersin.figshare.com/ndownloader/files/21027735)
Supplement: Supplementary file 1 [file 21027735]

Supplementary Material

# Supplementary Text

**Supplementary Text 1.** The text below provides additional technical explanation and geological decision backgrounds to the Global geological heterogeneity parameterization covered by subsection 2.3 of the main text.

***Geological decision background***

The set of equations in this supplementary text was developed to produce a first-order global continental shelf geological heterogeneity estimation. In setting up the equations, established general insights into the geological development of shelf along passive margins has been the starting point. Passive margin shelves are longer lived (many millions of years) and are larger than their active margin counterparts, meaning that they dominate the global shelf terrain. The increase in glacial low stand depths and glacial climate change severity by 1 Ma ago, is commonly echoed as a regionally traceable seismic reflector and a step change in lower shelf clinoform dimensions. This makes that for passive margin shelf regions (and also sectors of active margin shelfs supplied by good-sized rivers), one can test the aquitard count predictions, or apply data-assimilation techniques to the synthetic architecture and heterogeneity predictions of this paper (main text section 2.2-2.4; this supplement).

As described in section 2.3 of the main text, the parameterization aimed to capture average composition of shelf top-set architecture over the last one million years. Within that time frame, glacial-interglacial climatic cyclicity made sediment delivery fluctuate both in volumes and in composition. In parallel, global ice-volume and ocean sea-level oscillated with 100 ka dominant periodicity between low stands, some 120 meters below and high stands around present MSL (e.g., Waelbroeck et al. 2002), with half cycles towards high stands occurring faster (~20 ka) than half cycles towards low stand (~80 ka). Especially to the inner shelf and intermediate shelf, this caused repeated inundation and subaerial exposure of the shelf floor, stalling and accelerating sediment though pass to the deep sea, as well as lateral dispersal of shelf sediment (e.g. Cohen & Lobo, 2013).

The glacial-interglacial scale climatic oscillations affect sediment production on tropical latitudes differently than at higher latitudes where periglacial and temperate conditions alternated, because episodes of stronger and weaker monsoons alternate at higher frequency (precession dominated, 19-23 ka cycles) than ice-sheet inception and glacial termination (the aforementioned 100-ka cyclicity). A subset of MARCAT shelf regions, those in direct vicinity to major ice sheets (e.g. North Sea) and a few more connected to them by major meltwater rivers (e.g. Mississippi / northern Gulf) receives additional sediment supply, not just because from frost-affected catchments, sediment production is (temporally) larger – but also because the catchment source area is larger than the modern (interglacial) situation. MARCAT regions that were ice-sheet covered in glacial periods (Hudson Bay and the Baltic Sea: glacial erosional mega-landforms rather than plate-tectonic ocean-margin sedimentary shelfs), are treated as to only receive sediments during interglacial times. They are sediment starved in comparison to non-glaciated shelves of similar size, relief and climate zone; the sediments that were produced around are used to accommodate nearby ocean-margin.

***Parameter and equation design***

Architectural style of continental shelf subsurface composition is characterized by assessing the sedimentation/ accommodation ratio (Y) for each COSCAT/MARCAT region (Eq. 1 in the main manuscript, here Eq. 2) and the main factors influencing that ratio. These main factors are sediment delivery (Qs) (corrected for loss to deep sea), the so-called sediment dispersal modifier (D), sand/mud compositional ratio (factor M), and long-term net subsidence (the so-called shelf subsidence factor R). To start with, the sediment flux Qs to each COSCAT/MARCAT region was estimated using the WHYMAP formulation (Syvitski et al. 2013):

| with | *Aland*continental catchment area feeding the shelf segment [km²],  *R*  maximum elevation in the catchment (relief factor) [],  *T* latitude-based long-term mean temperature [],  *3, 4,  5, k* regression coefficients cf. Syvitski et al. 2013: their Table 3 | Eq. 1 |
| --- | --- | --- |

Next, further dataset-queries and algebraic estimations and conversions (Eq. 2-5) were executed to specify the factors defining the accumulation ratio Y (Eq. 2). Herein, Eq. 3 is a step of unit conversion (from Qs in kg/s incoming, to *q*s in m/Ma vertically accumulating). It uses a uniform bulk density of 2250 kg/m3 and porosity value of 30%, based on Reynolds et al. (1991). Equations 4a-h specify the ‘sediment type’ factor M as the long-term average sand/mud delivery ratio to the coastal zone. That calculation makes use of Holocene (interglacial) sand and mud proportions (by weight) as mapped across different shelves based on traditional sea-floor sampling (overview first compiled by Hayes 1967). For glaciation-affected shelves (those segments supplied by ice-marginal river systems; following the Pleistocene glaciation extents of Ehlers & Gibbard 2004), the interglacial sand/mud ratios are not representative for long term sediment supply. Eq. 4e-h increase the proportion of sand and decrease that of mud to compensate for this (amount of increase based on Nam et al. 1995). The sediment dispersion modifier D (Eq. 5ab) is 1 for all but one of Walsh & Nitrouer (2009)’s shelf categories (EAD: Estuarine Accumulation Dominated; PAD: Proximal Accumulation Dominated; SDC: Subaqueous delta clinoforms; MDD: Marine dispersal dominated). It is set to 0.1 for those shelved captured by major submarine canyon systems. The factors M and D are used as a modifier of Qs. The shelf subsidence factor R represents long-term provision of accommodation space owing to two components of subsidence (Eq. 6): intrinsic tectonic subsidence owing to gradual cooling of oceanic crust underlying the typical passive-margin shelf (tailing out with increasing age; first term in Eq. 5; based on Karner & Watch 1982) and a sediment compaction component dependent on the sedimentation volume and the compositional weight (second term). The full set of factors can be seen as hydrogeological indicator variables, the meaning of which is summarized in main text Figure 1.

|  |  | Eq. 2 |
| --- | --- | --- |
| With | where  *Qs*= land-derived sediment delivered to the shelf [kg/s]  Ashelf = shelf segment area [m2] | Eq. 3 |
| and | *M* = sand/mud ratio [-] indicating the sediment type  *M* = *psand* * *pmud*  *psand*= 0.5 * *psand,ig* + 0.5 * *psand,gl*  *pmud*= 0.5 * *pmud,ig* + 0.5 * *pmud,gl*  with *p* for proportion and interglacial (‘*ig*’) and glacial (‘*gl*’) conditions attributed equal time  For *not* glacially influenced shelfs:  *psand* = *psand,ig*= *psand,gl* and *pmud* = *pmud,ig*= *pmud,gl*  For glacially influenced shelfs:  *psand* = *psand,ig** 1.25 and *pmud*  = *pmud,ig*/ 1.25  i.e. *psand,gl* = 1.5 *psand,ig*and *pmud,gl* = 0.6 *pmud.ig* | Eq. 4  Eq. 4aEq. 4b  Eq. 4c,d  Eq. 4e,f  Eq. 4g,h |
| and | D = sediment dispersion modifier, for categories Walsh & Nitrouer (2009)  For shelf segments that are submarine-canyon captured:  D = 0.1 i.e. only 10% of sediment delivery stays on the shelf  For the other categories:  D = 1 i.e. 100% of sediment delivery is shelf-accommodated | Eq. 5a  Eq. 5b |
| and | R = shelf subsidence factor [-]; is directly related to the long term relative sea-level rise  with *t* = Age of ocean-crust below shelf [Ma]. | Eq. 6 |

The calculations weigh in and applied modifiers acknowledge that ocean sea-level oscillated some 130 meters during the last 10 glacial-interglacial cycles since the Early/Middle Pleistocene transition and less so in the Early Pleistocene before (e.g. Pillans et al., 1998), and that climatic conditions and sediment production fluctuated likewise (e.g. Nam et al., 1995; Syvitski et al., 2013). Sea-level oscillations have caused good parts of the coastal plain and shelf areas to be regressed and transgressed, and makes that preservation of aquitard strata within the shelf topset is spatially and vertically variable.

The full MSc thesis “The geology of coastal aquifer worldwide” written by Maria Karssenberg upon which the above summary is based can be provided on request. The references cited in this supplementary text are also cited in the main text (and its reference section).

# Supplementary Figures and Tables

## Supplementary Figures

**
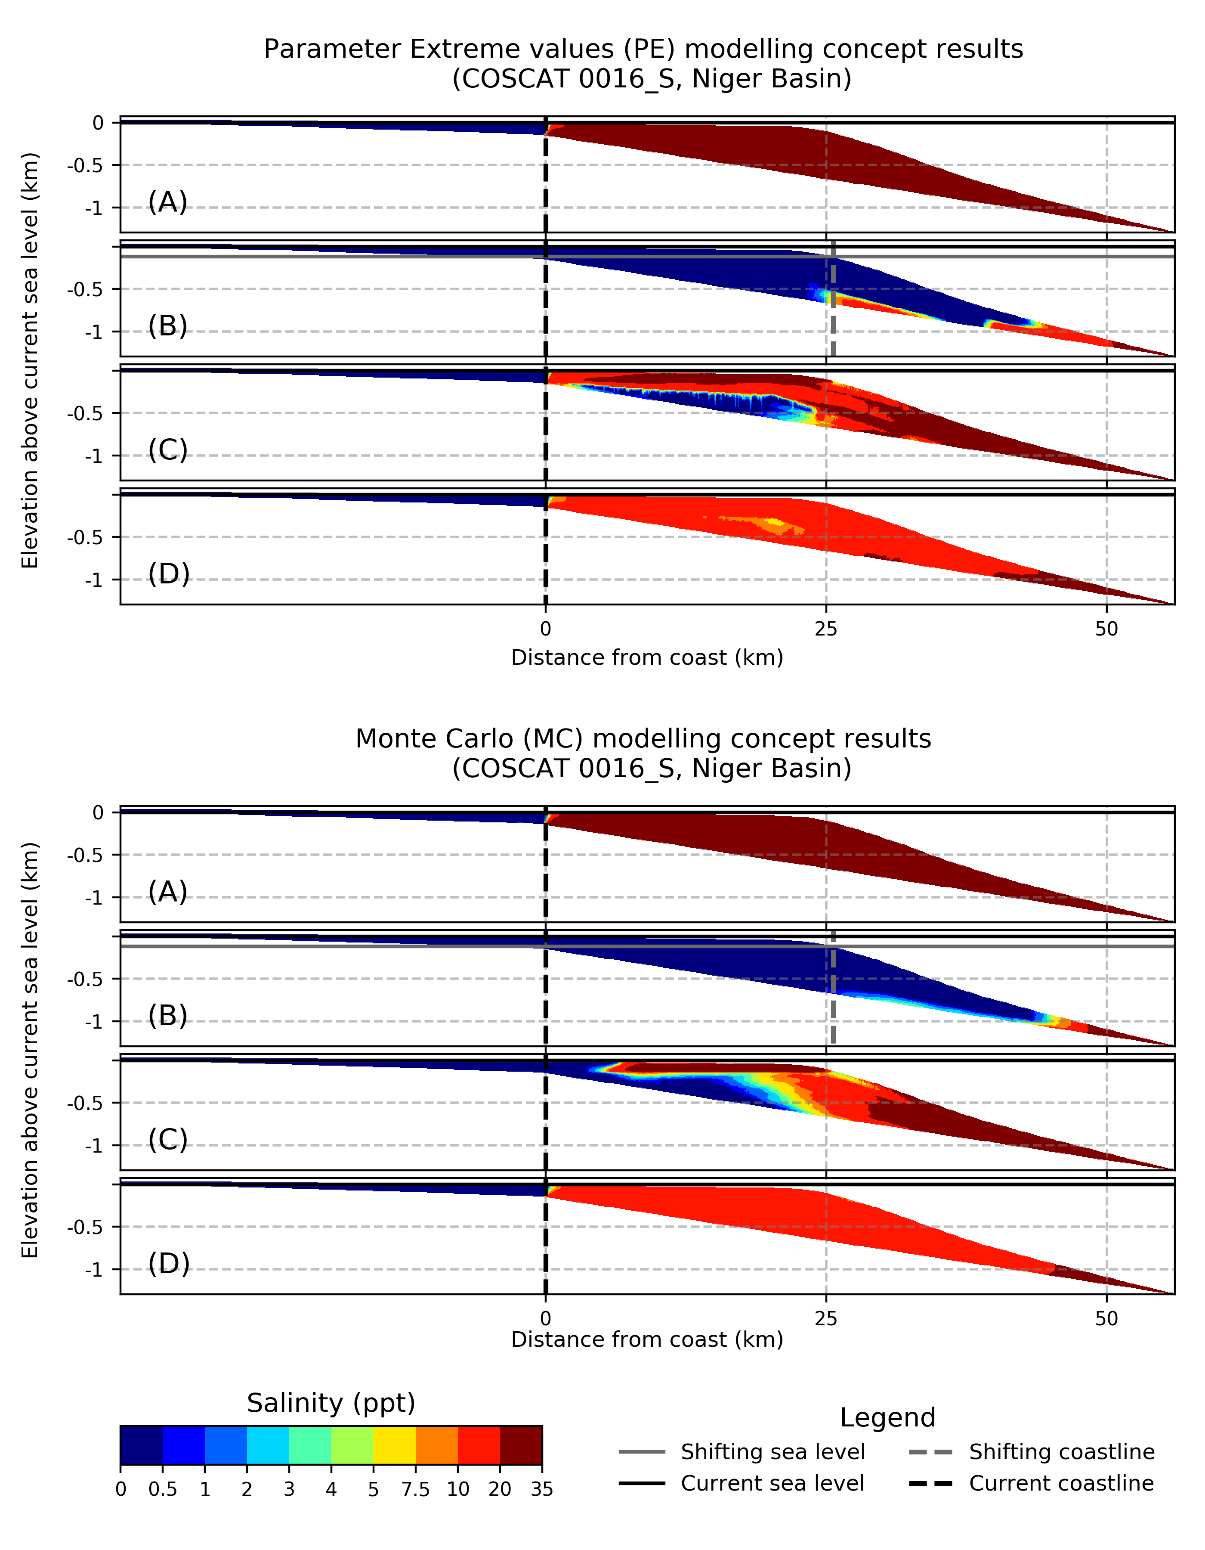
**

**Supplementary Figure 1** Averaged salinity profiles for both modelling concepts at four timeframes (see Table 2) for COSCAT 0016_S region (Niger Basin). The estimated salinity concentration in the 2D profiles is represented: (A) at the end of SP 0, salinity concentration before fluctuating sea level SPs; (B) at the lowest sea level occurring at the end of the sea level drop represented by SP 21; (C) after the relatively fast sea level rise back to the current sea level at the end of SP 31; and finally (D) estimation of future conditions in 20 ka from present at the end of SP 31_DSP.

**
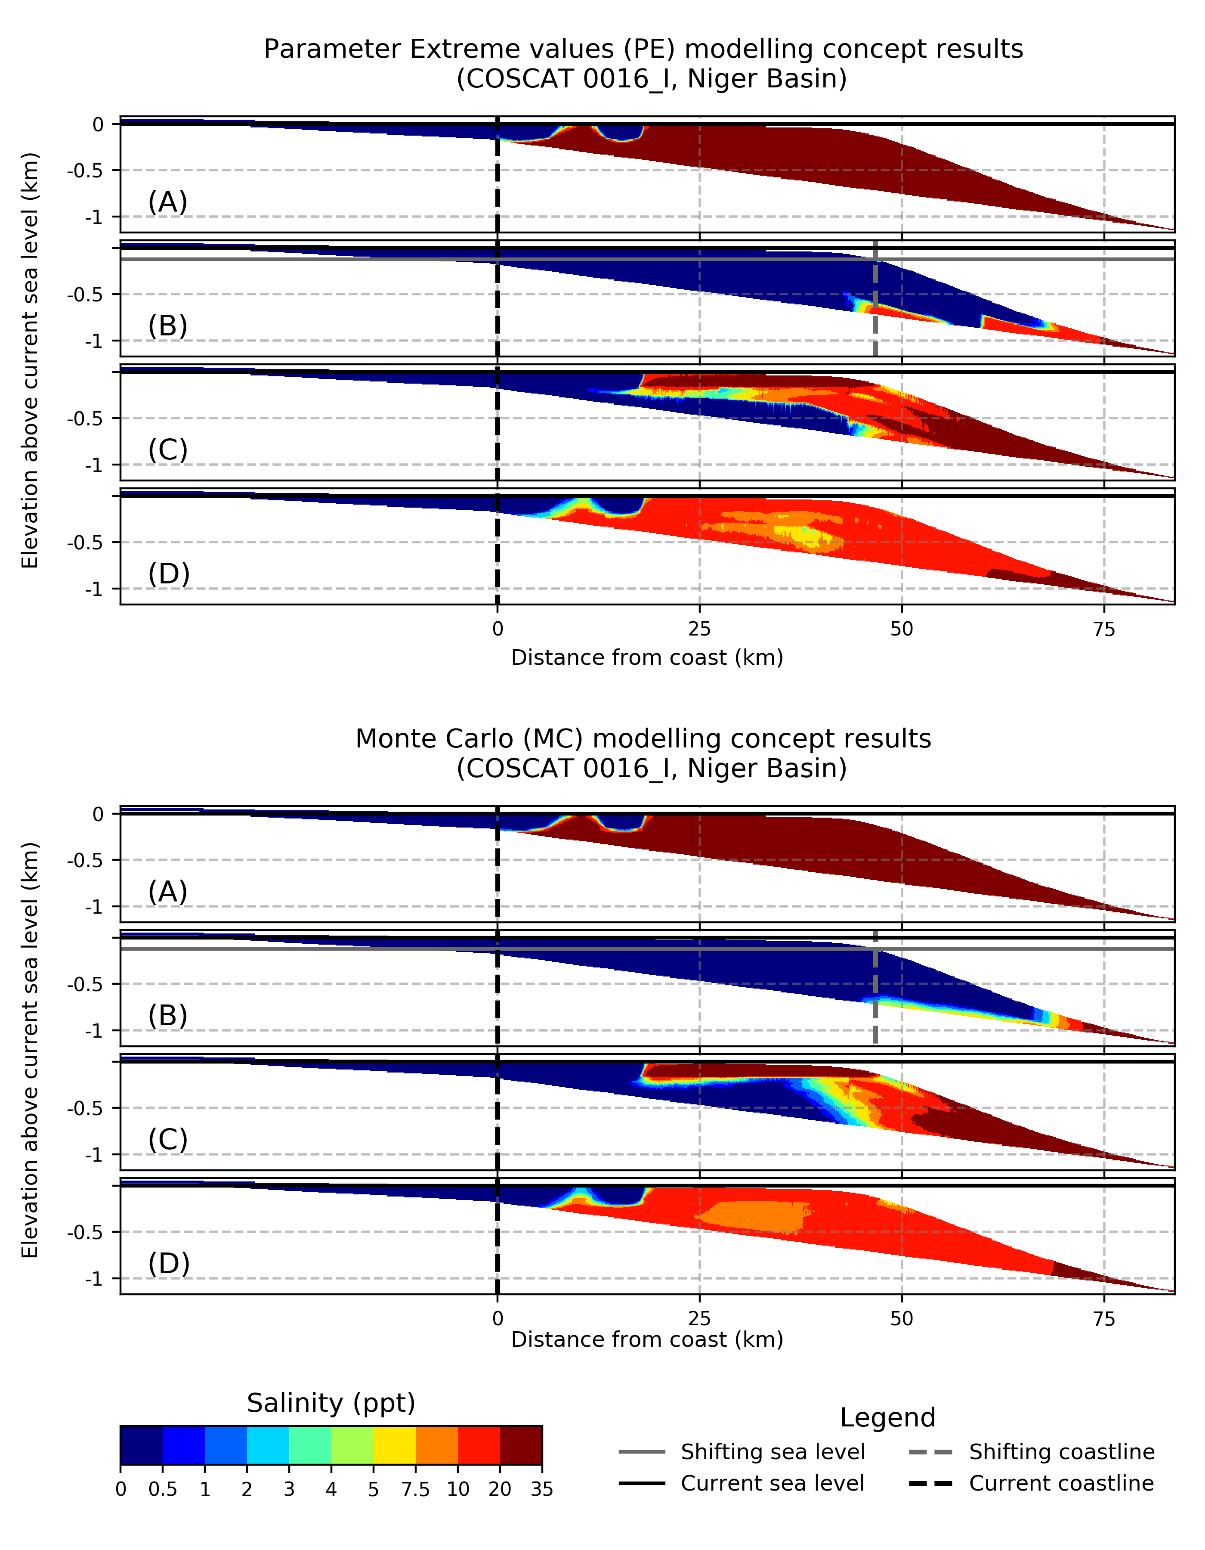
**

Supplementary Figure 2 Averaged salinity profiles for both modelling concepts at four timeframes (see Table 2) for COSCAT 0016_I region (Niger Basin). The estimated salinity concentration in the 2D profiles is represented: (A) at the end of SP 0, salinity concentration before fluctuating sea level SPs; (B) at the lowest sea level occurring at the end of the sea level drop represented by SP 21; (C) after the relatively fast sea level rise back to the current sea level at the end of SP 31; and finally (D) estimation of future conditions in 20 ka from present at the end of SP 31_DSP.
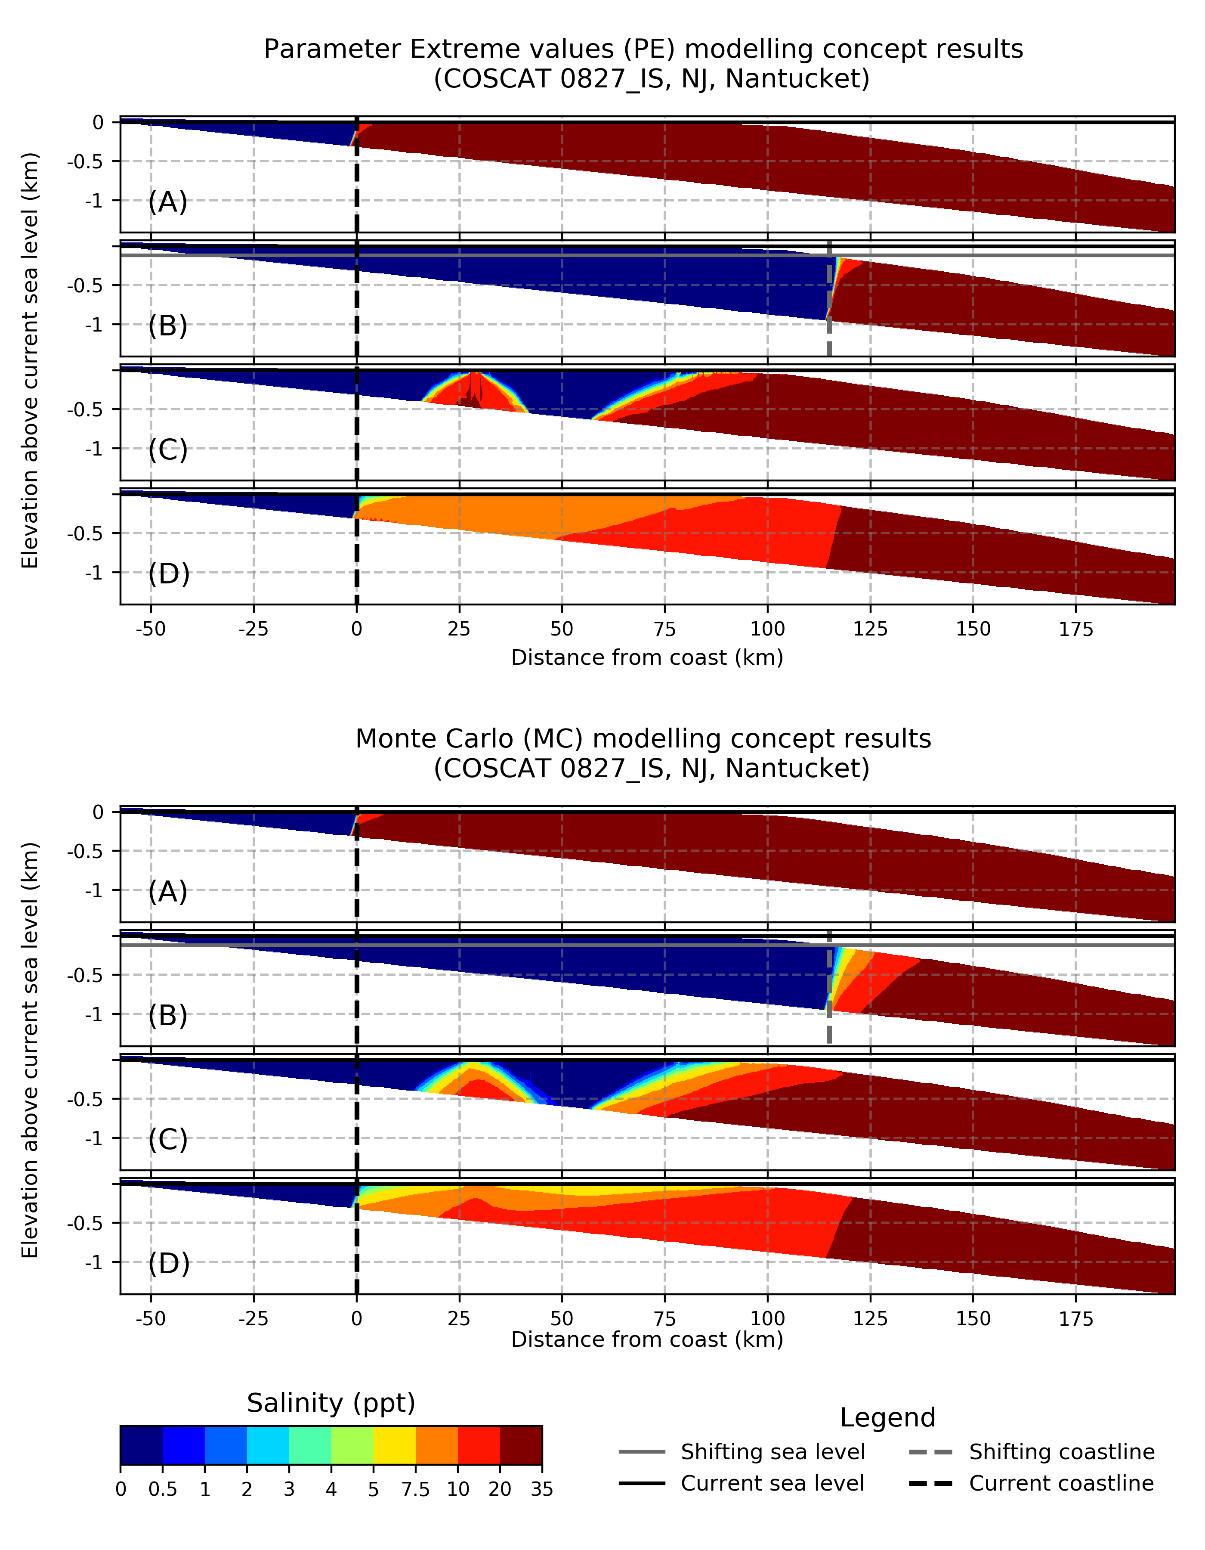
Supplementary Figure 3 Averaged salinity profiles for both modelling concepts at four timeframes (see Table 2) for COSCAT 0827_IS region (NJ, Nantucket, east coast USA). The estimated salinity concentration in the 2D profiles is represented: (A) at the end of SP 0, salinity concentration before fluctuating sea level SPs; (B) at the lowest sea level occurring at the end of the sea level drop represented by SP 21; (C) after the relatively fast sea level rise back to the current sea level at the end of SP 31; and finally (D) estimation of future conditions in 20 ka from present at the end of SP 31_DSP.


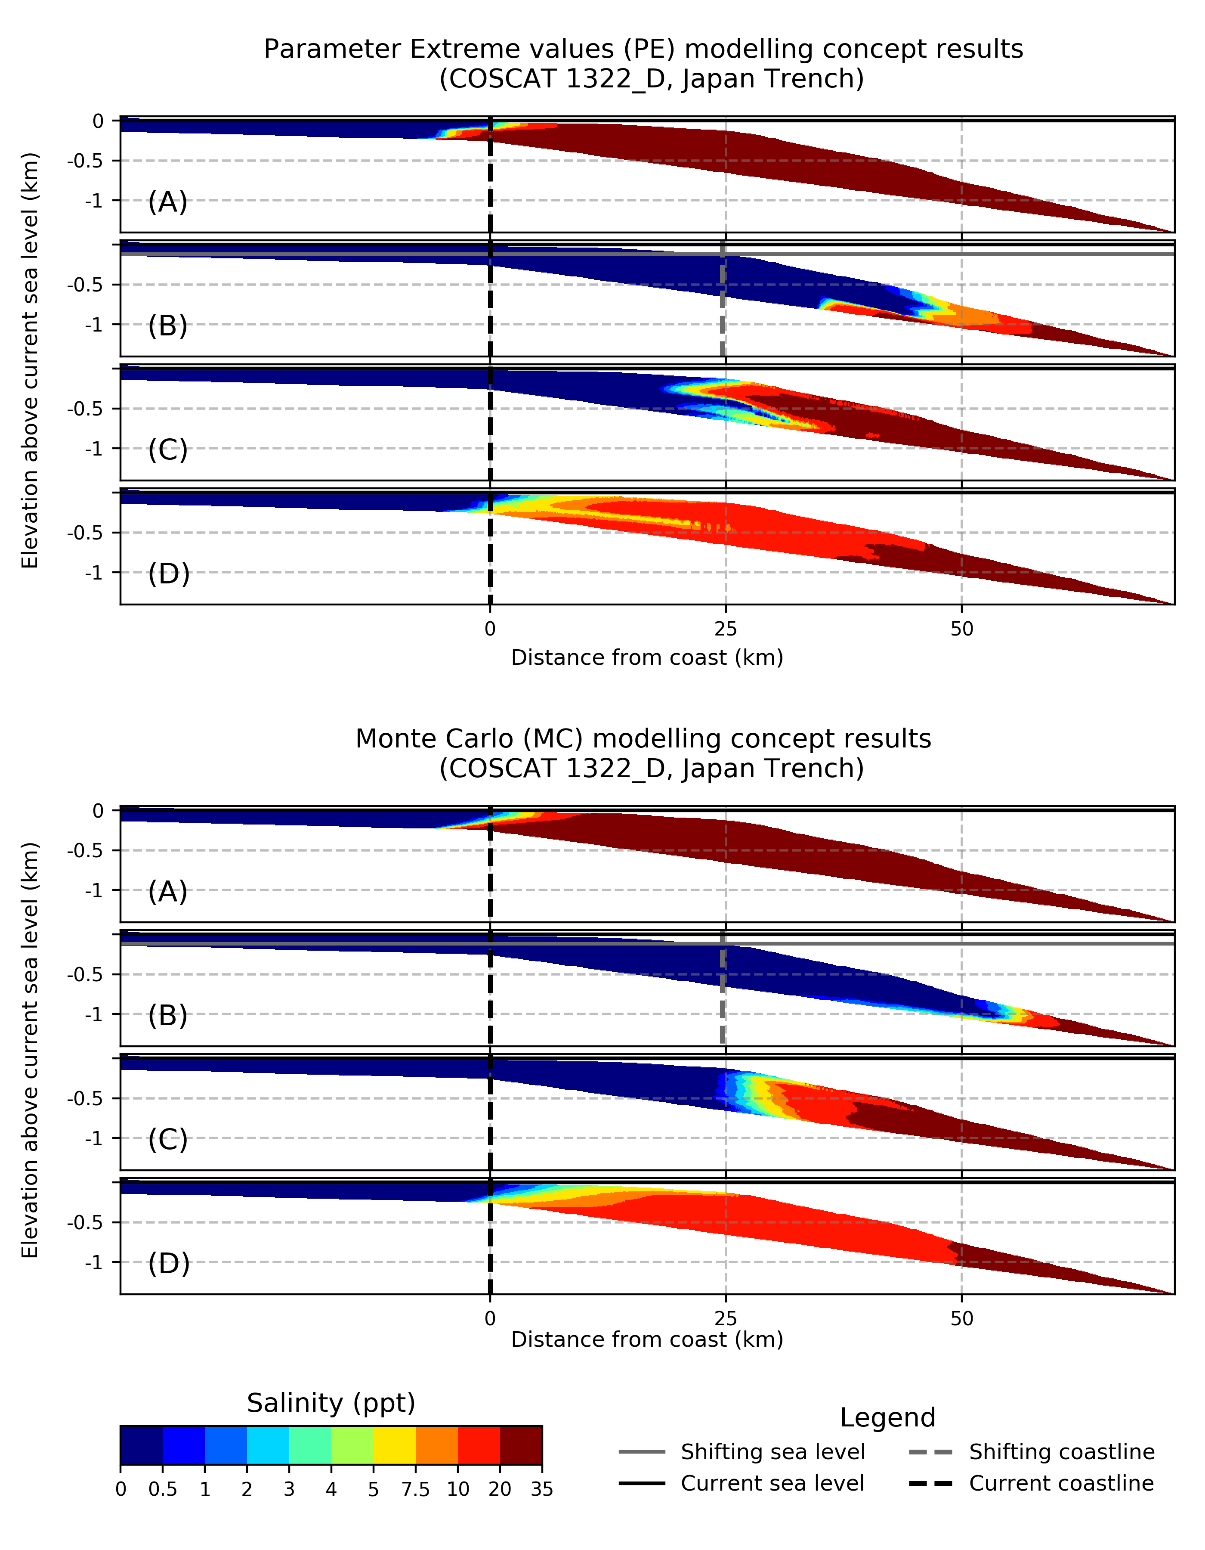
Supplementary Figure 4 Averaged salinity profiles for both modelling concepts at four timeframes (see Table 2) for COSCAT 1322_D region (Japan Trench). The estimated salinity concentration in the 2D profiles is represented: (A) at the end of SP 0, salinity concentration before fluctuating sea level SPs; (B) at the lowest sea level occurring at the end of the sea level drop represented by SP 21; (C) after the relatively fast sea level rise back to the current sea level at the end of SP 31; and finally (D) estimation of future conditions in 20 ka from present at the end of SP 31_DSP.
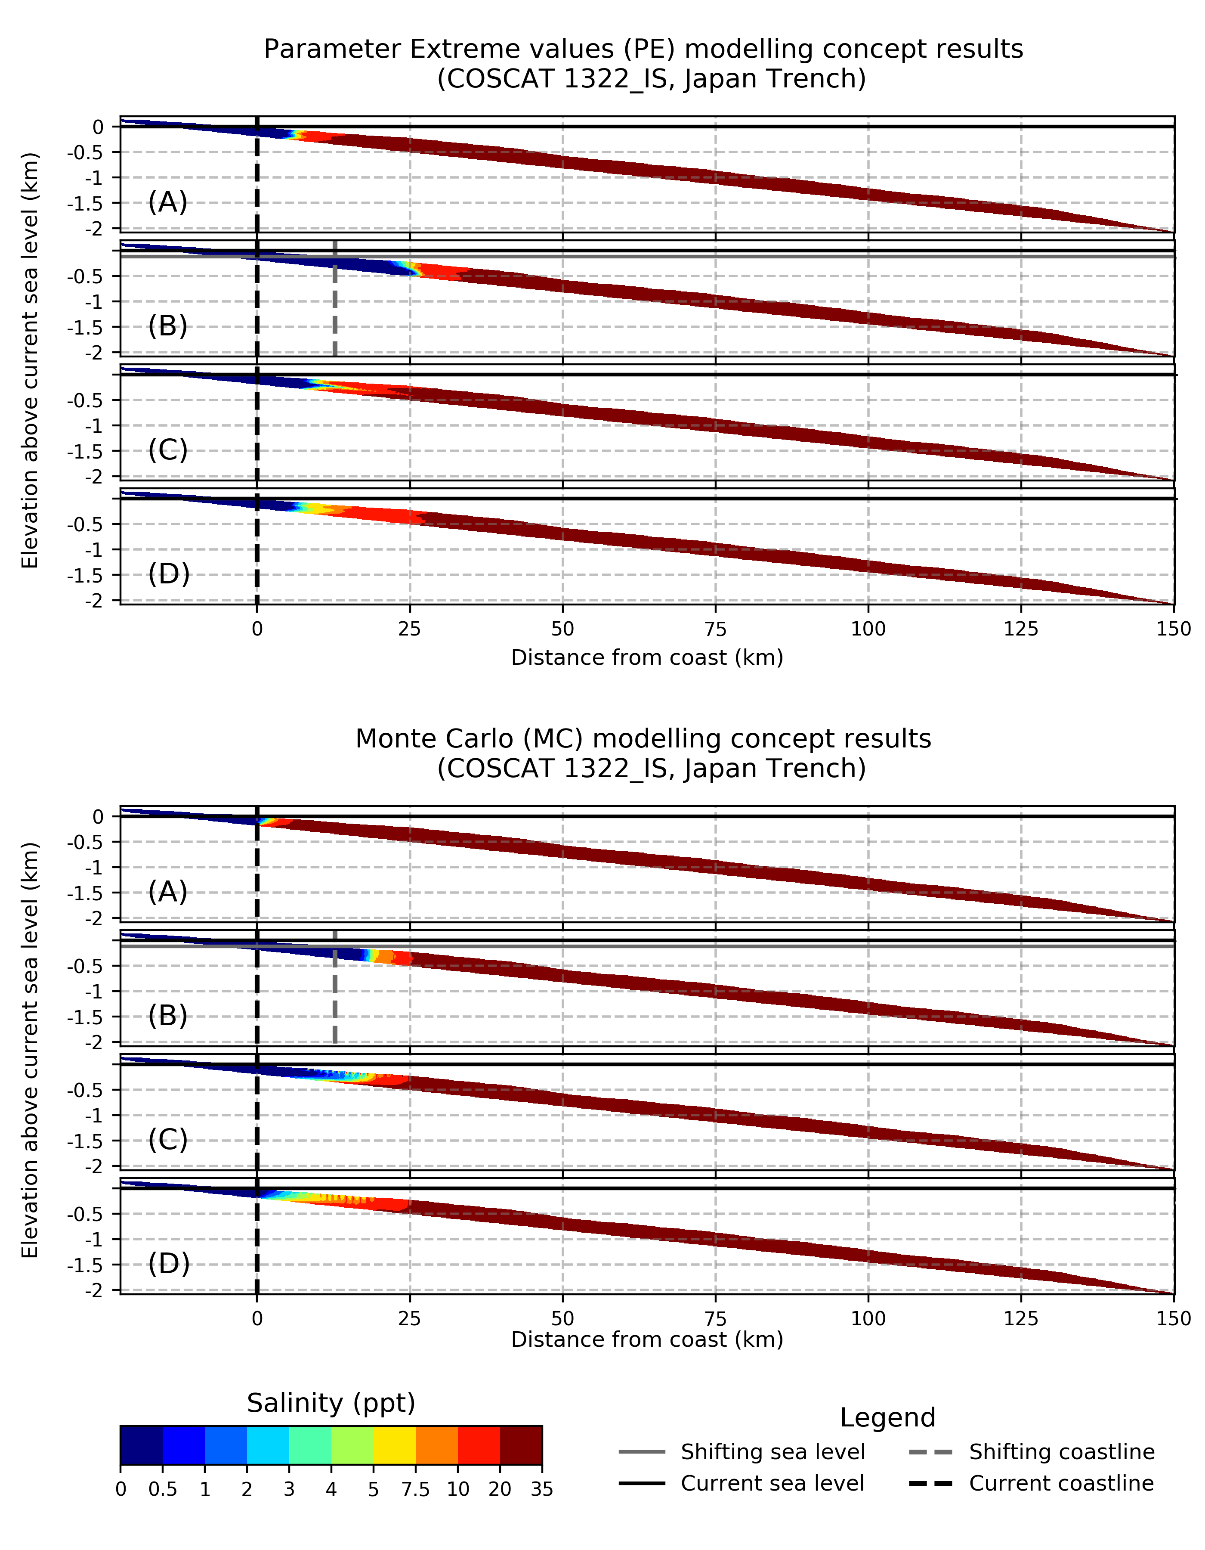
Supplementary Figure 5 Averaged salinity profiles for both modelling concepts at four timeframes (see Table 2) for COSCAT 1322_IS region (Japan Trench). The estimated salinity concentration in the 2D profiles is represented: (A) at the end of SP 0, salinity concentration before fluctuating sea level SPs; (B) at the lowest sea level occurring at the end of the sea level drop represented by SP 21; (C) after the relatively fast sea level rise back to the current sea level at the end of SP 31; and finally (D) estimation of future conditions in 20 ka from present at the end of SP 31_DSP.
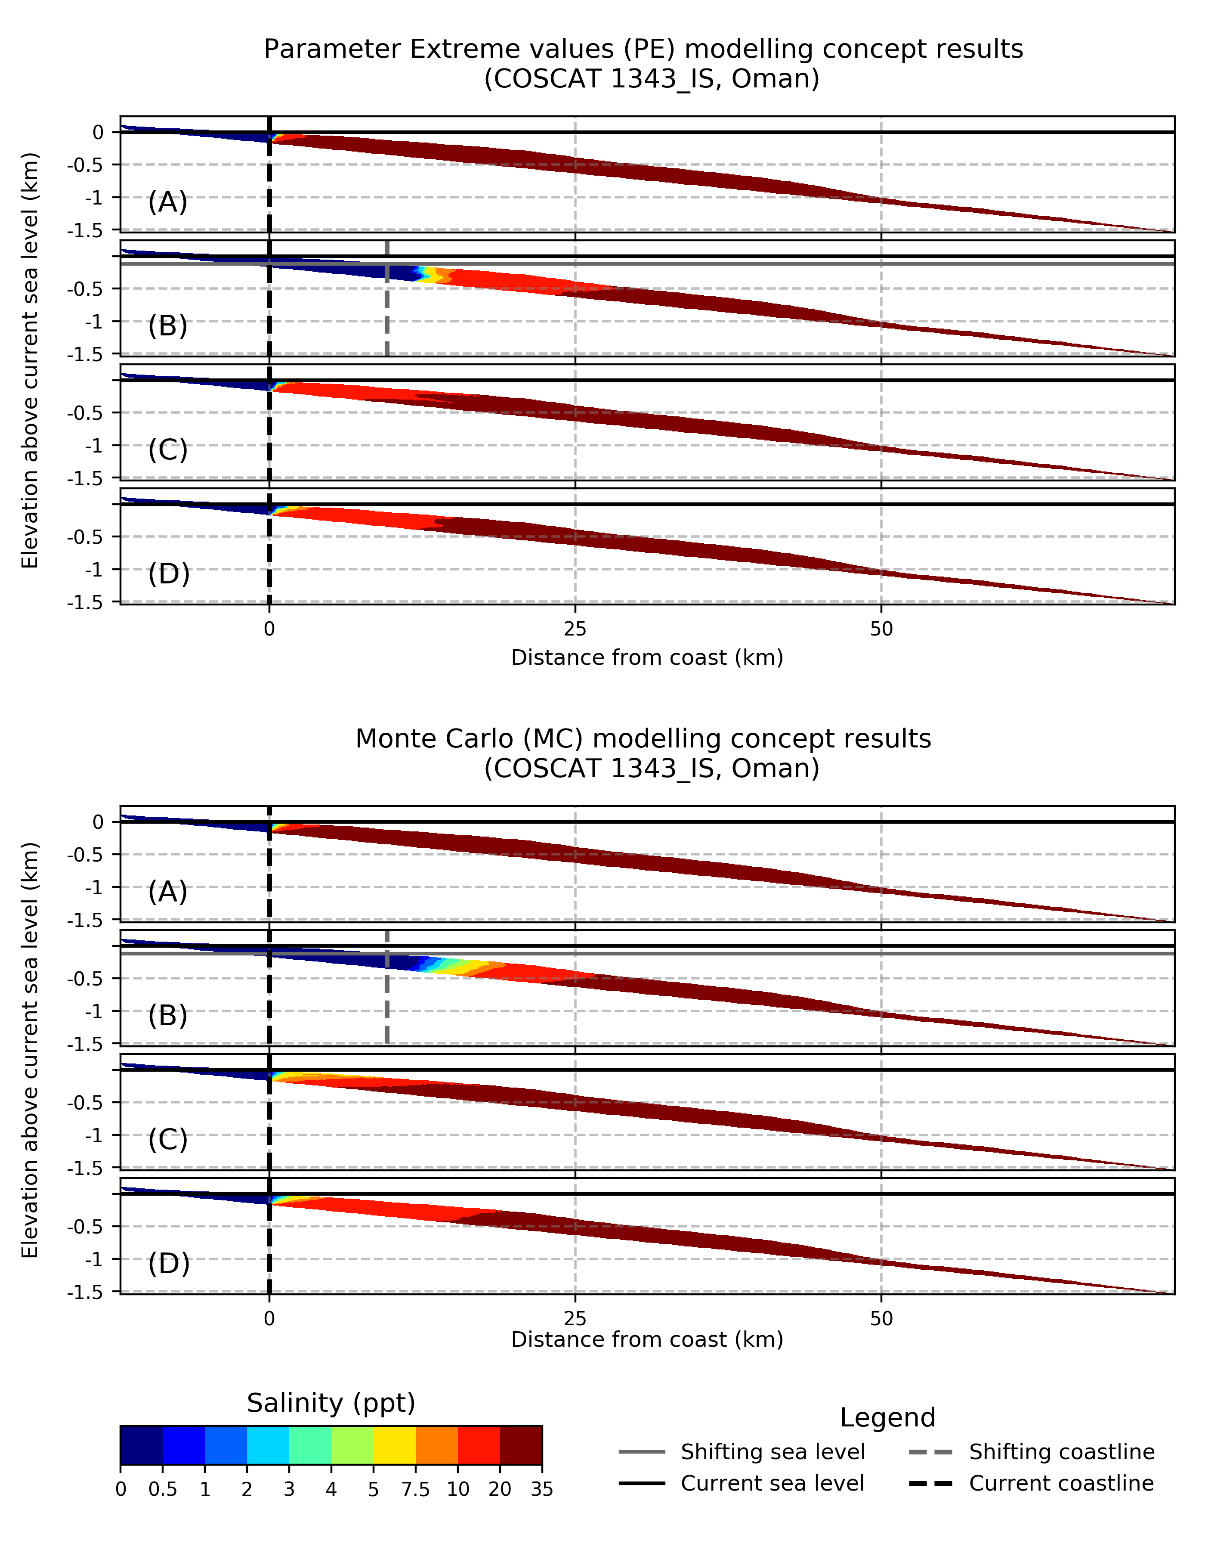
Supplementary Figure 6 Averaged salinity profiles for both modelling concepts at four timeframes (see Table 2) for COSCAT 1343_IS region (Oman). The estimated salinity concentration in the 2D profiles is represented: (A) at the end of SP 0, salinity concentration before fluctuating sea level SPs; (B) at the lowest sea level occurring at the end of the sea level drop represented by SP 21; (C) after the relatively fast sea level rise back to the current sea level at the end of SP 31; and finally (D) estimation of future conditions in 20 ka from present at the end of SP 31_DSP.
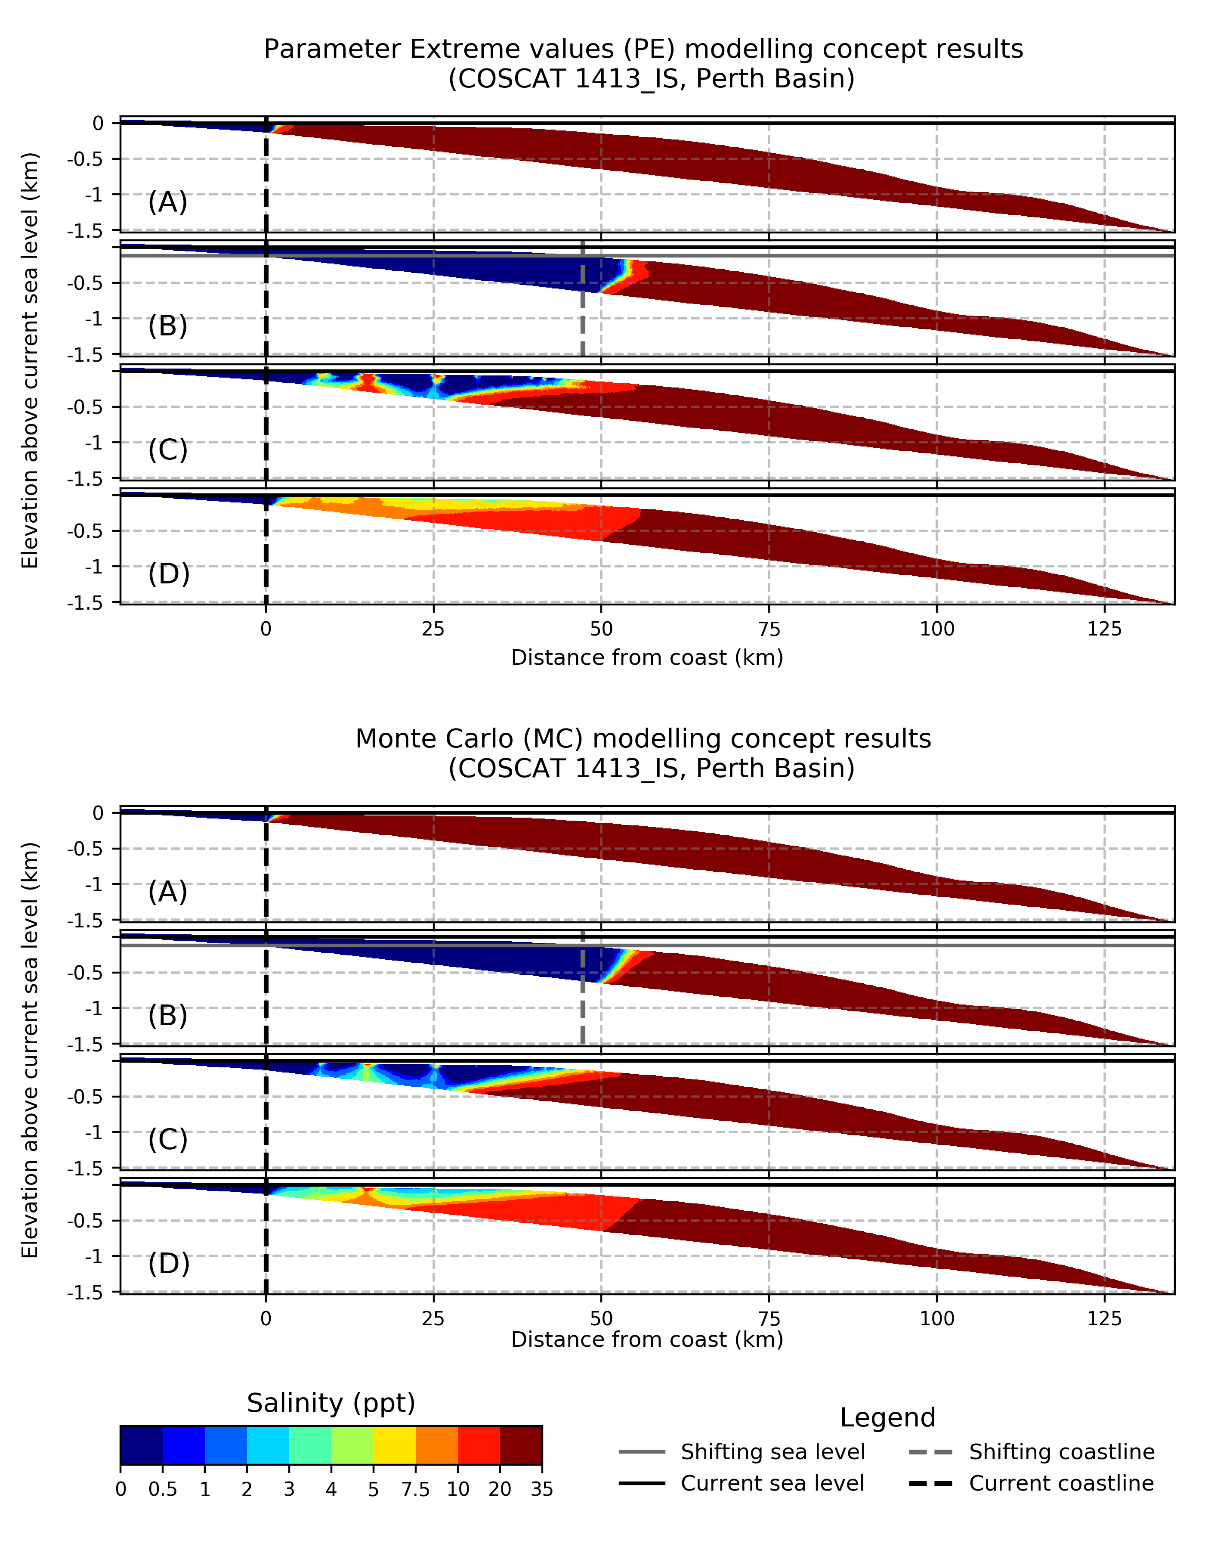
Supplementary Figure 7 Averaged salinity profiles for both modelling concepts at four timeframes (see Table 2) for COSCAT 1413_IS region (Perth Basin). The estimated salinity concentration in the 2D profiles is represented: (A) at the end of SP 0, salinity concentration before fluctuating sea level SPs; (B) at the lowest sea level occurring at the end of the sea level drop represented by SP 21; (C) after the relatively fast sea level rise back to the current sea level at the end of SP 31; and finally (D) estimation of future conditions in 20 ka from present at the end of SP 31_DSP.
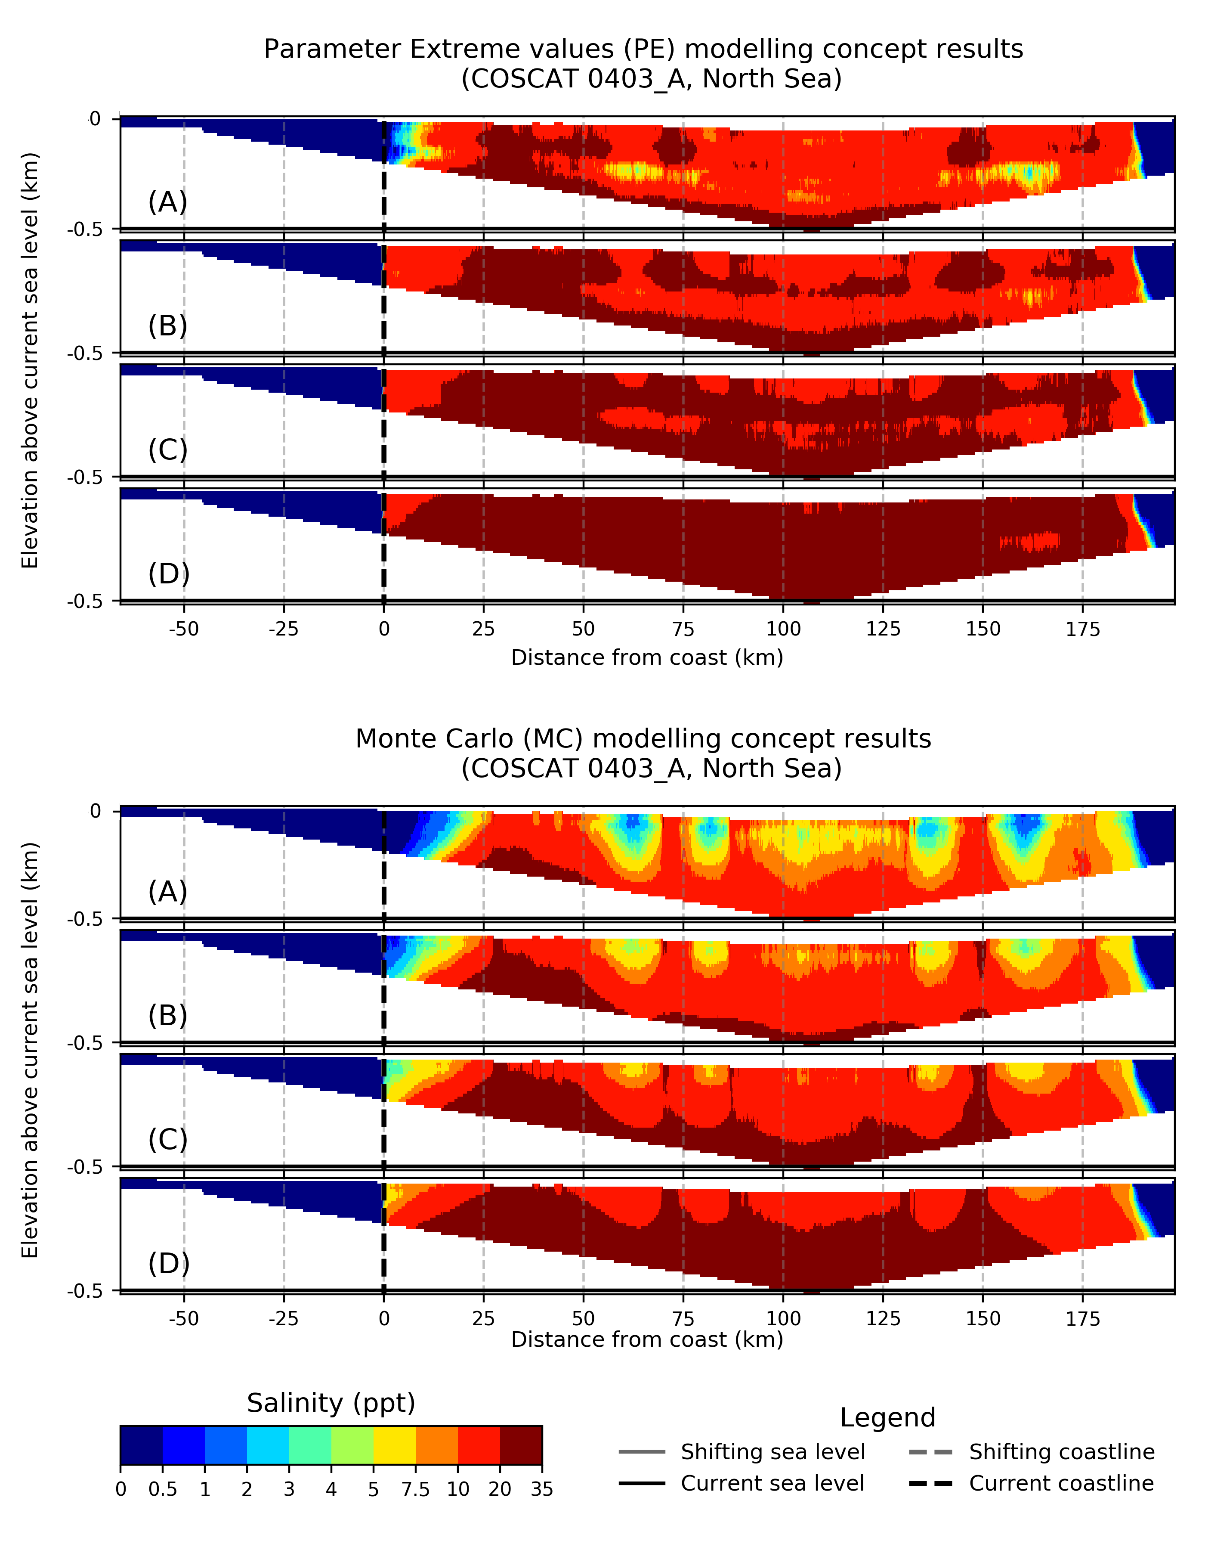
Supplementary Figure 8 Averaged salinity profiles for both modelling concepts at four timeframes (see Table 2) for COSCAT 0403_A region (North Sea). The estimated salinity concentration in the 2D profiles is represented: (A) estimated current situation (B) 5ka from current situation; (C) 10ka from current situation; and finally (D) 20ka from current situation; and finally. Sea level is constant throughout the whole simulation and equal to 0m bsl (current sea level).

## Supplementary Tables

Supplementary Table 1 Parameter values applied to the SEAWAT models of all Average Representative Profiles (ARPs).

| **Parameter type** | **Value** |
| --- | --- |
| Model layer thickness (m) | 10 |
| Width of the model cell(m) | 100 |
| Time step length (years) | 10 |
| Layer type | confined |
| Head change criterion for convergence (m) (hclose) | 1.00E-04 |
| Residual criterion for convergence (m³/d) (rclose) | 10 |
| Effective porosity (-) | 0.35 |
| Solver type | Finite Difference |
| Longitudinal dispersivity (m) | 1 |
| Ratio horizontal transverse disp./ long. disp. (-) | 0.1 |
| Diffusion coefficient (m²/d) | 8.64E-05 |

Supplementary Table 2 Geological heterogeneity parameter values for both modelling concepts (extreme parameter values combinations and randomized Monte Carlo parameterization), total number of numerical model simulations is highlighted in the brackets. ¹Randomized geological parameters, ²Parameters quantified based on literature sources.

| **Geological parameter** | **Parameter Extremes (24)** | **Monte Carlo (100)** |
| --- | --- | --- |
| ¹Aquifer-aquitard layer combinations (-) | (2, 5) | rand(2, 5) |
| ¹Clay layer stacking factor (-) | (0.5, 0.75, 1.0) | rand(0.5, 1.0) |
| ¹Clay layer start (km offshore) | (-2.5, 2.5) | rand(-2.5, 2.5) |
| ¹Offshore clay cap thickness (m) | (10, 30) | rand(10, 30) |
| ²Aquifer layer hydraulic conductivity (m/d) | (Gleeson et al., 2014) | |
| ²Aquitard layer hydraulic conductivity (m/d) | (Huscroft et al., 2018) | |
| ²Top sediment layer thickness (m) | (Hengl et al., 2014) | |
| ²Offshore clay cap presence (shelf and slope) | (Dutkiewicz et al., 2015) | |

Supplementary Table 3 Fresh groundwater fractions (volumes in km3 are shown in Table 7) comparison between the two modelling concepts (PE is extreme parameter values combinations and MC is randomized Monte Carlo), average fractions are extracted at the end of SP 31 (see Figure 6). The inland domain is defined as a stretch 10km long from the coastline in the inland direction, the continental shelf spans from the coastline to the continental shelf edge (see also Figure 3, 5) and the offshore domain entails the whole part of the model domain that is submerged at present-day.

| **COSCAT name (ID)** | **Coastal type (ARP)** | **avg. % fresh inland** | | | **avg. % fresh shelf** | | | **avg. % fresh offshore** | | |
| --- | --- | --- | --- | --- | --- | --- | --- | --- | --- | --- |
| **PE** | **MC** | **abs. diff** | **PE** | **MC** | **abs. diff** | **PE** | **MC** | **abs. diff** |
| Niger Basin (0016) | S | 99.8 | 99.7 | 0.1 | 31.8 | 23.1 | 8.7 | 17.5 | 14.8 | 2.7 |
| I | 100.0 | 100.0 | 0.0 | 63.3 | 67.0 | 3.7 | 41.9 | 45.0 | 3.1 |
| Suriname (1103) | A | 97.1 | 99.1 | 2.0 | 22.8 | 29.9 | 7.0 | 13.4 | 17.6 | 4.1 |
| Perth Basin (1413) | IS | 100.0 | 100.0 | 0.0 | 66.5 | 73.3 | 6.8 | 17.9 | 18.9 | 1.1 |
| Oman (1343) | IS | 100.0 | 99.9 | 0.1 | 41.6 | 39.3 | 2.4 | 7.3 | 7.1 | 0.3 |
| Japan Trench (1322) | D | 100.0 | 100.0 | 0.0 | 79.1 | 89.6 | 10.5 | 39.5 | 45.7 | 6.2 |
| IS | 100.0 | 100.0 | 0.0 | 80.7 | 88.3 | 7.6 | 8.2 | 9.1 | 0.9 |
| North Sea (0403) | A | 100.0 | 100.0 | 0.0 | 24.0 | 44.9 | 20.9 | 26.7 | 46.9 | 20.2 |
| Nantucket, NJ (0827) | IS | 99.2 | 100 | 0.8 | 52.1 | 67.2 | 15.2 | 25.6 | 32.6 | 7.0 |

Supplementary Table 4 SEAWAT model runtime comparison between the two modelling concepts. The Avg. runtime column displays the average runtime (hrs) per one simulation for both modelling concepts. Total runtime is the sum of all simulations for the PE (24 simulations) and MC (100 simulations) modelling concepts.

| **COSCAT name (ID)** | **Coastal type** | **Avg. runtime [hrs/simulation]** | | **Total runtime [hrs]** | |
| --- | --- | --- | --- | --- | --- |
|
| **PE** | **MC** | **PE** | **MC** |
| Niger Basin (0016) | S | 41 | 38 | 995 | 3780 |
| I | 68 | 71 | 1635 | 7135 |
| Suriname (1103) | A | 17 | 20 | 405 | 2047 |
| Perth Basin (1413) | IS | 10 | 16 | 233 | 1612 |
| Oman (1343) | IS | 19 | 22 | 459 | 2232 |
| Japan Trench (1322) | D | 45 | 36 | 1088 | 3563 |
| IS | 72 | 52 | 1731 | 5218 |
| North Sea (0403) | A | 12 | 16 | 290 | 1616 |
| Nantucket, NJ (0827) | IS | 133 | 86 | 3195 | 8560 |
| Mean | | 46 | 40 | 1115 | 3974 |
| Sum | | 417 | 357 | 10031 | 35763 |

**Supplementary Table 5** Global geological heterogeneity results for all considered COSCAT regions. The Qs, S/M and Y values are divided into three classes as follows: 1 – low, 2 –medium, 3 – high. The offshore sand and mud percentages are derived from the dataset by Dutkiewicz et al. (2015), see Section 2.3 in the main manuscript.

| **COSCAT ID** | **Sand %** | **Mud %** | **Qs [-]** | **S/M [-]** | **Y [-]** | **Sand % (shelf)** | **Mud % (shelf)** | **Sand % (slope)** | **Mud % (slope)** |
| --- | --- | --- | --- | --- | --- | --- | --- | --- | --- |
| 1 | 49.0 | 51.0 | 3 | 1 | 3 | 30.1 | 69.9 | 10.9 | 89.1 |
| 2 | 49.0 | 51.0 | 3 | 1 | 3 | 19.8 | 80.2 | 4.0 | 96.0 |
| 3 | 49.0 | 51.0 | 3 | 1 | 3 | 0.0 | 100.0 | 0.0 | 100.0 |
| 4 | 51.0 | 49.0 | 3 | 2 | 2 | 3.4 | 96.6 | 0.5 | 99.5 |
| 5 | 59.5 | 40.5 | 3 | 2 | 3 | 0.0 | 100.0 | 0.0 | 100.0 |
| 6 | 62.0 | 38.0 | 3 | 3 | 3 | 0.0 | 100.0 | 0.0 | 100.0 |
| 7 | 62.0 | 38.0 | 3 | 3 | 3 | 0.0 | 100.0 | 0.0 | 100.0 |
| 8 | 56.5 | 43.5 | 2 | 2 | 3 | 0.0 | 100.0 | 0.0 | 100.0 |
| 9 | 56.5 | 43.5 | 3 | 2 | 3 | 0.0 | 100.0 | 0.0 | 100.0 |
| 10 | 56.5 | 43.5 | 3 | 2 | 3 | 0.0 | 100.0 | 11.5 | 88.5 |
| 11 | 62.0 | 38.0 | 3 | 3 | 3 | 0.0 | 100.0 | 0.0 | 100.0 |
| 12 | 62.0 | 38.0 | 2 | 3 | 3 | 65.1 | 34.9 | 25.2 | 74.8 |
| 13 | 44.0 | 56.0 | 2 | 1 | 2 | 59.0 | 41.0 | 32.6 | 67.4 |
| 14 | 44.0 | 56.0 | 2 | 1 | 2 | 0.0 | 100.0 | 0.0 | 100.0 |
| 15 | 44.0 | 56.0 | 3 | 1 | 3 | 0.0 | 100.0 | 0.0 | 100.0 |
| 16 | 44.0 | 56.0 | 3 | 1 | 3 | 0.0 | 100.0 | 0.0 | 100.0 |
| 17 | 44.0 | 56.0 | 3 | 1 | 3 | 0.0 | 100.0 | 0.0 | 100.0 |
| 18 | 64.0 | 36.0 | 2 | 3 | 2 | 0.0 | 100.0 | 0.0 | 100.0 |
| 19 | 64.0 | 36.0 | 3 | 3 | 3 | 0.0 | 100.0 | 0.0 | 100.0 |
| 20 | 64.0 | 36.0 | 3 | 3 | 3 | 0.0 | 100.0 | 0.0 | 100.0 |
| 21 | 64.0 | 36.0 | 3 | 3 | 3 | 0.0 | 100.0 | 0.0 | 100.0 |
| 401 | 75.8 | 24.3 | 2 | 3 | 2 | 0.0 | 100.0 | 0.0 | 100.0 |
| 402 | 75.8 | 24.3 | 1 | 3 | 2 | 16.0 | 84.0 | 37.4 | 62.6 |
| 403 | 75.8 | 24.3 | 2 | 3 | 2 | 9.9 | 90.1 | 30.5 | 69.5 |
| 404 | 66.0 | 34.0 | 2 | 3 | 2 | 0.0 | 100.0 | 0.0 | 100.0 |
| 405 | 66.0 | 34.0 | 1 | 3 | 1 | 50.0 | 50.0 | 50.0 | 50.0 |
| 406 | 66.0 | 34.0 | 1 | 3 | 1 | 0.0 | 100.0 | 0.0 | 100.0 |
| 407 | 50.3 | 49.7 | 1 | 2 | 1 | 50.0 | 50.0 | 50.0 | 50.0 |
| 408 | 50.3 | 49.7 | 1 | 2 | 1 | 14.9 | 85.2 | 8.1 | 91.9 |
| 409 | 50.3 | 49.7 | 1 | 2 | 1 | 50.0 | 50.0 | 50.0 | 50.0 |
| 411 | 49.0 | 51.0 | 3 | 1 | 3 | 0.0 | 100.0 | 0.0 | 100.0 |
| 412 | 49.0 | 51.0 | 3 | 1 | 3 | 0.0 | 100.0 | 0.0 | 100.0 |
| 413 | 49.0 | 51.0 | 2 | 1 | 2 | 0.0 | 100.0 | 0.0 | 100.0 |
| 414 | 49.0 | 51.0 | 3 | 1 | 3 | 0.0 | 100.0 | 0.0 | 100.0 |
| 415 | 49.0 | 51.0 | 2 | 1 | 2 | 16.5 | 83.5 | 4.5 | 95.5 |
| 416 | 58.4 | 41.6 | 3 | 2 | 3 | 0.0 | 100.0 | 0.0 | 100.0 |
| 418 | 49.0 | 51.0 | 3 | 1 | 3 | 2.3 | 97.7 | 2.2 | 97.9 |
| 419 | 64.0 | 36.0 | 3 | 3 | 3 | 0.0 | 100.0 | 0.0 | 100.0 |
| 501 | 50.3 | 49.7 | 1 | 2 | 1 | 50.0 | 50.0 | 50.0 | 50.0 |
| 502 | 50.3 | 49.7 | 1 | 2 | 1 | 50.0 | 50.0 | 50.0 | 50.0 |
| 503 | 50.3 | 49.7 | 1 | 2 | 1 | 50.0 | 50.0 | 50.0 | 50.0 |
| 504 | 50.3 | 49.7 | 1 | 2 | 1 | 50.0 | 50.0 | 50.0 | 50.0 |
| 505 | 50.3 | 49.7 | 1 | 2 | 1 | 50.0 | 50.0 | 50.0 | 50.0 |
| 801 | 73.0 | 27.0 | 3 | 3 | 2 | 0.0 | 100.0 | 0.0 | 100.0 |
| 802 | 73.0 | 27.0 | 2 | 3 | 2 | 26.4 | 73.6 | 12.3 | 87.7 |
| 803 | 73.0 | 27.0 | 3 | 3 | 3 | 21.1 | 78.9 | 20.4 | 79.6 |
| 804 | 73.0 | 27.0 | 3 | 3 | 3 | 0.0 | 100.0 | 0.0 | 100.0 |
| 805 | 73.0 | 27.0 | 3 | 3 | 3 | 0.0 | 100.0 | 0.0 | 100.0 |
| 806 | 73.0 | 27.0 | 2 | 3 | 2 | 30.4 | 69.6 | 6.2 | 93.8 |
| 807 | 68.5 | 31.5 | 3 | 3 | 3 | 0.0 | 100.0 | 0.0 | 100.0 |
| 808 | 78.1 | 21.9 | 3 | 3 | 3 | 30.9 | 69.1 | 7.3 | 92.7 |
| 809 | 78.1 | 21.9 | 3 | 3 | 2 | 30.2 | 69.8 | 1.3 | 98.7 |
| 810 | 68.9 | 31.1 | 1 | 3 | 1 | 50.0 | 50.0 | 50.0 | 50.0 |
| 811 | 68.9 | 31.1 | 1 | 3 | 2 | 50.0 | 50.0 | 50.0 | 50.0 |
| 812 | 68.9 | 31.1 | 1 | 3 | 1 | 50.0 | 50.0 | 50.0 | 50.0 |
| 813 | 68.9 | 31.1 | 1 | 3 | 1 | 50.0 | 50.0 | 50.0 | 50.0 |
| 814 | 68.9 | 31.1 | 1 | 3 | 1 | 50.0 | 50.0 | 50.0 | 50.0 |
| 815 | 68.9 | 31.1 | 1 | 3 | 1 | 50.0 | 50.0 | 50.0 | 50.0 |
| 816 | 50.3 | 49.7 | 1 | 2 | 1 | 50.0 | 50.0 | 50.0 | 50.0 |
| 817 | 50.3 | 49.7 | 1 | 1 | 1 | 50.0 | 50.0 | 50.0 | 50.0 |
| 818 | 50.3 | 49.7 | 1 | 1 | 1 | 50.0 | 50.0 | 50.0 | 50.0 |
| 819 | 50.3 | 49.7 | 1 | 1 | 1 | 50.0 | 50.0 | 50.0 | 50.0 |
| 820 | 50.3 | 49.7 | 1 | 1 | 1 | 50.0 | 50.0 | 50.0 | 50.0 |
| 821 | 50.3 | 49.7 | 2 | 2 | 2 | 50.0 | 50.0 | 50.0 | 50.0 |
| 822 | 50.3 | 49.7 | 1 | 2 | 1 | 50.0 | 50.0 | 50.0 | 50.0 |
| 823 | 50.3 | 49.7 | 1 | 2 | 1 | 50.0 | 50.0 | 50.0 | 50.0 |
| 824 | 58.4 | 41.6 | 3 | 2 | 3 | 50.0 | 50.0 | 50.0 | 50.0 |
| 825 | 58.4 | 41.6 | 2 | 2 | 3 | 34.4 | 65.6 | 16.9 | 83.1 |
| 826 | 58.4 | 41.6 | 1 | 2 | 2 | 71.2 | 28.8 | 50.2 | 49.9 |
| 827 | 90.2 | 9.8 | 1 | 3 | 2 | 23.0 | 77.0 | 16.5 | 83.6 |
| 828 | 63.0 | 37.0 | 2 | 3 | 2 | 37.1 | 62.9 | 8.2 | 91.9 |
| 830 | 65.5 | 34.5 | 2 | 3 | 2 | 0.0 | 100.0 | 0.0 | 100.0 |
| 831 | 65.5 | 34.5 | 2 | 3 | 2 | 0.0 | 100.0 | 0.0 | 100.0 |
| 832 | 60.0 | 40.0 | 2 | 2 | 2 | 0.0 | 100.0 | 0.0 | 100.0 |
| 833 | 60.0 | 40.0 | 3 | 2 | 3 | 0.0 | 100.0 | 0.0 | 100.0 |
| 834 | 72.1 | 27.9 | 3 | 3 | 3 | 36.3 | 63.7 | 6.1 | 93.9 |
| 1101 | 65.5 | 34.5 | 2 | 3 | 2 | 0.0 | 100.0 | 6.9 | 93.1 |
| 1102 | 57.5 | 42.5 | 3 | 2 | 3 | 0.1 | 99.9 | 0.0 | 100.0 |
| 1103 | 57.5 | 42.5 | 3 | 2 | 3 | 0.0 | 100.0 | 0.0 | 100.0 |
| 1104 | 57.5 | 42.5 | 3 | 2 | 3 | 0.0 | 100.0 | 0.0 | 100.0 |
| 1105 | 57.5 | 42.5 | 2 | 2 | 2 | 0.0 | 100.0 | 0.0 | 100.0 |
| 1106 | 57.5 | 42.5 | 3 | 2 | 3 | 23.6 | 76.4 | 27.3 | 72.7 |
| 1107 | 57.5 | 42.5 | 1 | 2 | 2 | 1.3 | 98.7 | 0.0 | 100.0 |
| 1108 | 57.5 | 42.5 | 3 | 2 | 3 | 96.3 | 3.7 | 53.0 | 47.0 |
| 1109 | 68.0 | 32.0 | 2 | 3 | 3 | 100.0 | 0.0 | 100.0 | 0.0 |
| 1110 | 73.7 | 26.3 | 1 | 3 | 2 | 93.8 | 6.2 | 100.0 | 0.0 |
| 1111 | 73.7 | 26.3 | 2 | 3 | 2 | 44.7 | 55.4 | 33.0 | 67.0 |
| 1112 | 73.7 | 26.3 | 3 | 3 | 3 | 24.3 | 75.7 | 1.7 | 98.3 |
| 1113 | 55.0 | 45.0 | 3 | 2 | 3 | 11.6 | 88.4 | 14.3 | 85.7 |
| 1114 | 55.0 | 45.0 | 2 | 2 | 2 | 16.4 | 83.6 | 7.3 | 92.7 |
| 1115 | 55.0 | 45.0 | 3 | 2 | 3 | 0.0 | 100.0 | 0.0 | 100.0 |
| 1116 | 55.0 | 45.0 | 3 | 2 | 3 | 0.0 | 100.0 | 0.0 | 100.0 |
| 1301 | 49.0 | 51.0 | 3 | 1 | 3 | 0.0 | 100.0 | 0.0 | 100.0 |
| 1303 | 49.0 | 51.0 | 2 | 1 | 3 | 2.5 | 97.5 | 9.8 | 90.2 |
| 1307 | 50.3 | 49.7 | 3 | 2 | 3 | 50.0 | 50.0 | 50.0 | 50.0 |
| 1308 | 50.3 | 49.7 | 1 | 2 | 1 | 50.0 | 50.0 | 50.0 | 50.0 |
| 1309 | 50.3 | 49.7 | 1 | 2 | 1 | 50.0 | 50.0 | 50.0 | 50.0 |
| 1310 | 75.5 | 24.5 | 1 | 3 | 1 | 50.0 | 50.0 | 50.0 | 50.0 |
| 1311 | 75.5 | 24.5 | 1 | 3 | 1 | 50.0 | 50.0 | 50.0 | 50.0 |
| 1312 | 50.3 | 49.7 | 1 | 2 | 1 | 50.0 | 50.0 | 50.0 | 50.0 |
| 1313 | 75.5 | 24.5 | 1 | 3 | 1 | 50.0 | 50.0 | 50.0 | 50.0 |
| 1314 | 75.5 | 24.5 | 1 | 3 | 1 | 50.0 | 50.0 | 50.0 | 50.0 |
| 1315 | 75.5 | 24.5 | 1 | 3 | 1 | 6.6 | 93.4 | 18.7 | 81.3 |
| 1316 | 75.5 | 24.5 | 3 | 3 | 3 | 46.9 | 53.1 | 34.9 | 65.2 |
| 1317 | 75.5 | 24.5 | 1 | 3 | 1 | 4.6 | 95.4 | 9.4 | 90.6 |
| 1318 | 75.5 | 24.5 | 3 | 3 | 3 | 0.0 | 100.0 | 0.0 | 100.0 |
| 1319 | 66.0 | 34.0 | 1 | 2 | 2 | 3.6 | 96.4 | 1.8 | 98.2 |
| 1320 | 66.0 | 34.0 | 2 | 2 | 2 | 17.1 | 82.9 | 26.6 | 73.5 |
| 1321 | 56.5 | 43.5 | 2 | 2 | 2 | 19.6 | 80.4 | 5.6 | 94.4 |
| 1322 | 56.5 | 43.5 | 2 | 2 | 2 | 0.8 | 99.2 | 0.6 | 99.5 |
| 1323 | 42.5 | 57.5 | 1 | 1 | 2 | 26.2 | 73.8 | 5.8 | 94.2 |
| 1324 | 66.0 | 34.0 | 1 | 2 | 2 | 32.6 | 67.4 | 93.7 | 6.3 |
| 1325 | 43.5 | 56.5 | 3 | 1 | 3 | 32.6 | 67.4 | 93.7 | 6.3 |
| 1326 | 43.5 | 56.5 | 2 | 1 | 2 | 26.1 | 73.9 | 0.0 | 100.0 |
| 1327 | 43.5 | 56.5 | 2 | 1 | 2 | 0.0 | 100.0 | 0.0 | 100.0 |
| 1328 | 42.5 | 57.5 | 1 | 1 | 2 | 31.9 | 68.1 | 0.0 | 100.0 |
| 1329 | 36.5 | 63.5 | 2 | 1 | 2 | 33.1 | 66.9 | 2.4 | 97.6 |
| 1330 | 42.5 | 57.5 | 1 | 1 | 2 | 24.3 | 75.7 | 0.0 | 100.0 |
| 1331 | 42.5 | 57.5 | 2 | 1 | 2 | 1.4 | 98.6 | 5.6 | 94.5 |
| 1332 | 42.5 | 57.5 | 2 | 1 | 2 | 10.3 | 89.7 | 8.6 | 91.4 |
| 1333 | 42.5 | 57.5 | 3 | 1 | 3 | 0.0 | 100.0 | 8.1 | 91.9 |
| 1334 | 42.5 | 57.5 | 2 | 1 | 2 | 18.9 | 81.1 | 15.1 | 84.9 |
| 1335 | 33.5 | 66.5 | 2 | 1 | 2 | 9.0 | 91.0 | 23.7 | 76.3 |
| 1336 | 33.5 | 66.5 | 3 | 1 | 3 | 0.0 | 100.0 | 0.0 | 100.0 |
| 1337 | 33.5 | 66.5 | 3 | 1 | 3 | 0.0 | 100.0 | 0.0 | 100.0 |
| 1338 | 47.0 | 53.0 | 2 | 1 | 2 | 0.0 | 100.0 | 0.0 | 100.0 |
| 1339 | 47.0 | 53.0 | 2 | 1 | 2 | 0.0 | 100.0 | 0.0 | 100.0 |
| 1340 | 47.0 | 53.0 | 3 | 1 | 3 | 0.0 | 100.0 | 0.0 | 100.0 |
| 1341 | 59.5 | 40.5 | 3 | 2 | 3 | 0.0 | 100.0 | 0.0 | 100.0 |
| 1342 | 42.5 | 57.5 | 3 | 1 | 3 | 0.0 | 100.0 | 0.0 | 100.0 |
| 1344 | 51.0 | 49.0 | 3 | 2 | 2 | 3.5 | 96.5 | 0.0 | 100.0 |
| 1401 | 42.5 | 57.5 | 1 | 1 | 2 | 7.1 | 92.9 | 7.3 | 92.8 |
| 1402 | 42.5 | 57.5 | 2 | 1 | 2 | 15.6 | 84.4 | 2.9 | 97.1 |
| 1403 | 71.5 | 28.5 | 1 | 3 | 2 | 33.4 | 66.6 | 9.3 | 90.8 |
| 1405 | 75.0 | 25.0 | 2 | 3 | 2 | 16.0 | 84.0 | 3.6 | 96.5 |
| 1406 | 75.0 | 25.0 | 2 | 3 | 2 | 19.2 | 80.8 | 24.4 | 75.6 |
| 1407 | 84.2 | 15.8 | 2 | 3 | 2 | 21.9 | 78.2 | 19.8 | 80.2 |
| 1408 | 84.2 | 15.8 | 1 | 3 | 2 | 0.0 | 100.0 | 0.0 | 100.0 |
| 1409 | 75.0 | 25.0 | 2 | 3 | 2 | 2.2 | 97.8 | 0.0 | 100.0 |
| 1410 | 71.5 | 28.5 | 2 | 3 | 2 | 0.0 | 100.0 | 0.0 | 100.0 |
| 1411 | 71.5 | 28.5 | 2 | 3 | 2 | 21.3 | 78.7 | 5.0 | 95.0 |
| 1412 | 71.5 | 28.5 | 1 | 3 | 2 | 29.2 | 70.9 | 13.6 | 86.4 |
| 1413 | 71.5 | 28.5 | 1 | 3 | 2 | 9.1 | 90.9 | 9.1 | 90.9 |
| 1414 | 71.5 | 28.5 | 1 | 3 | 2 | 16.0 | 84.1 | 5.8 | 94.2 |
| 1415 | 71.5 | 28.5 | 1 | 3 | 2 | 61.9 | 38.1 | 33.5 | 66.5 |
| 1416 | 42.5 | 57.5 | 1 | 1 | 2 | 26.4 | 73.6 | 0.0 | 100.0 |
| 417 | 49.0 | 51.0 | 2 | 1 | 2 | 0.0 | 100.0 | 0.0 | 100.0 |
| 829 | 63.0 | 37.0 | 3 | 3 | 3 | 0.0 | 100.0 | 0.0 | 100.0 |
| 1501 | 50.0 | 50.0 | 1 | 1 | 1 | 50.0 | 50.0 | 50.0 | 50.0 |
| 1502 | 50.0 | 50.0 | 1 | 1 | 1 | 50.0 | 50.0 | 50.0 | 50.0 |
| 1503 | 50.0 | 50.0 | 1 | 1 | 1 | 50.0 | 50.0 | 50.0 | 50.0 |
| 1504 | 50.0 | 50.0 | 1 | 1 | 1 | 50.0 | 50.0 | 50.0 | 50.0 |
| 1505 | 50.0 | 50.0 | 1 | 1 | 1 | 50.0 | 50.0 | 50.0 | 50.0 |
| 1343 | 61.4 | 38.6 | 2 | 1 | 2 | 0.0 | 100.0 | 0.0 | 100.0 |
